# Supplementary material for: Repurposing Clemastine to Target Glioblastoma Cell Stemness
Source: MDPI journal article supplement (doi:10.3390/cancers15184619), 2023-09-18
Supplement: s1 [file s1]

**Table S3. List of antibodies used for immunoblotting and immunofluorescence staining.**

| Name                                              | Vendor         | Catalog Number | RRID        | Dilution for immunoblotting | Dilution for IF |
|---------------------------------------------------|----------------|----------------|-------------|-----------------------------|-----------------|
| Nestin                                            | MilliporeSigma | ABD69          | AB_2744681  |                             | 1:500           |
| SOX2                                              | Cell Signaling | 3579S          | AB_2195767  | 1:1000                      | 1:400           |
| PDGF receptor $\alpha$                            | Cell Signaling | 3174S          | AB_2162345  | 1:1000                      |                 |
| PDGF receptor $\alpha$                            | Cell Signaling | 5241S          | AB_10692773 |                             | 1:400           |
| CSPG4                                             | Cell Signaling | 43916S         | N/A         |                             | 1:200           |
| OLIG2                                             | Novus          | NBP1-28667     | AB_1914109  | 1:3000                      | 1:1000          |
| Galactocerebroside                                | MilliporeSigma | MAB342         | AB_94857    |                             | 1:200           |
| EBP                                               | Santa Cruz     | sc-374267      | AB_11012162 | 1:500                       |                 |
| $\alpha$ -tubulin                                 | Cell Signaling | 3873S          | AB_1904178  | 1:1000                      |                 |
| Anti-rabbit IgG, HRP-linked Antibody              | Cell Signaling | 7074S          | AB_2099233  | 1:1000                      |                 |
| Anti-mouse IgG, HRP-linked Antibody               | Cell Signaling | 7076S          | AB_330924   | 1:1000                      |                 |
| Goat anti-Rabbit IgG (H+L) - Alexa Fluor 594      | ThermoFisher   | A-11037        | AB_2534095  |                             | 1:500           |
| Goat anti-Rabbit IgG (H+L) - Alexa Fluor 647      | ThermoFisher   | A-21245        | AB_2535813  |                             | 1:500           |
| Goat anti-Rabbit IgG (H+L) - Alexa Fluor Plus 488 | ThermoFisher   | A32731         | AB_2633280  |                             | 1:500           |
| Goat anti-Mouse IgG (H+L) - Alexa Fluor 488       | ThermoFisher   | A-11029        | AB_2534088  |                             | 1:500           |
| Goat anti-Mouse IgG (H+L) - Alexa Fluor Plus 488  | ThermoFisher   | A32723         | AB_2633275  |                             | 1:800-1:1000    |
| Goat anti-Mouse IgG (H+L) - Alexa Fluor Plus 647  | ThermoFisher   | A32728         | AB_2633277  |                             | 1:200-1:1000    |
| Normal Rabbit IgG                                 | MilliporeSigma | 12-370         | AB_145841   |                             | 1:1200-1:20000  |
| Normal Mouse IgG                                  | MilliporeSigma | 12-371         | AB_145840   |                             | 1:2500          |
| Rabbit IgG Isotype Control                        | ThermoFisher   | 31235          | AB_243593   |                             | 1:1200-1:20000  |
| Mouse IgG Isotype Control                         | ThermoFisher   | 31903          | AB_10959891 |                             | 1:2500          |
