# Supplementary material for: Repurposing Clemastine to Target Glioblastoma Cell Stemness
Source: MDPI journal article supplement (doi:10.3390/cancers15184619), 2023-09-18

File S1: Original Images for Blots and Gels

Figure 2B

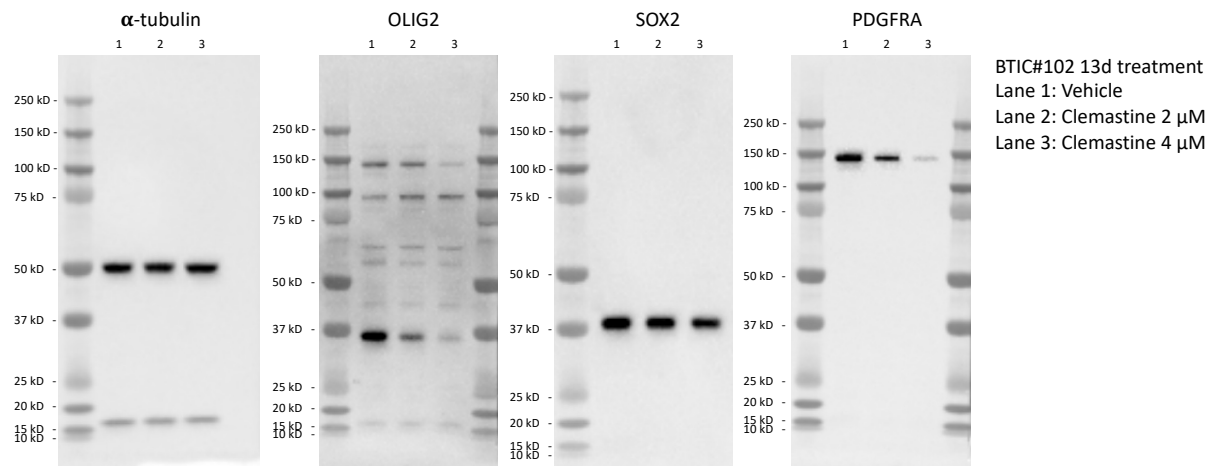

Supplementary Fig. 3B

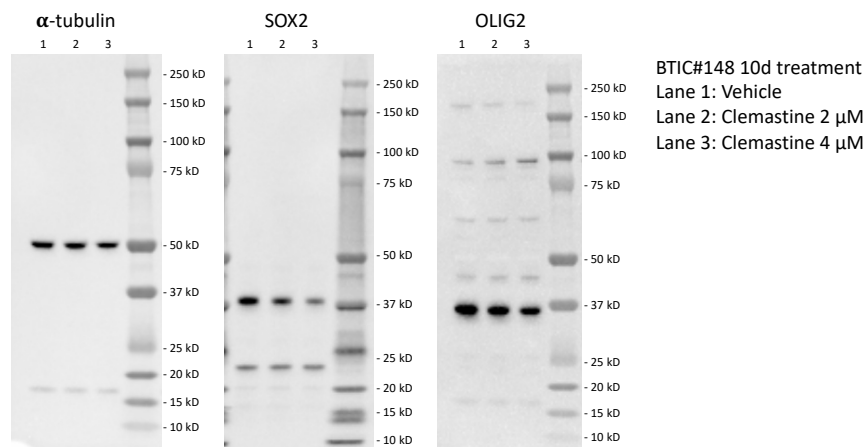

Supplementary Fig. 6E

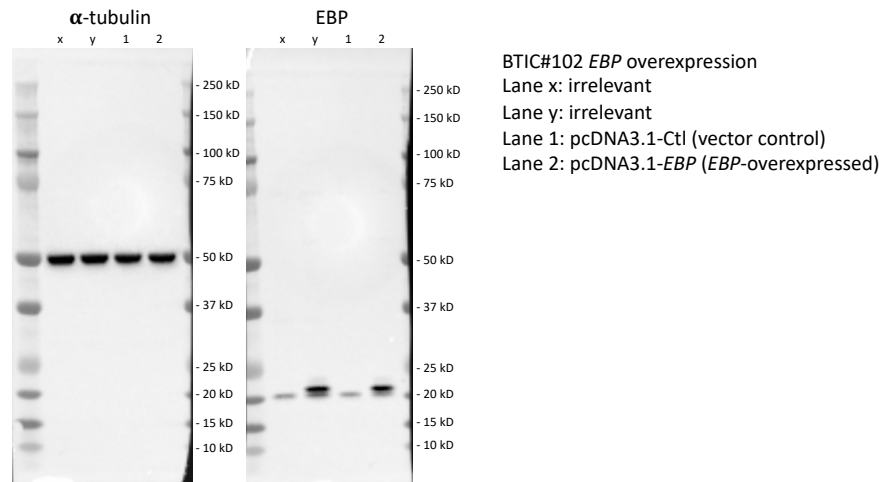

Supplementary Fig. 6G

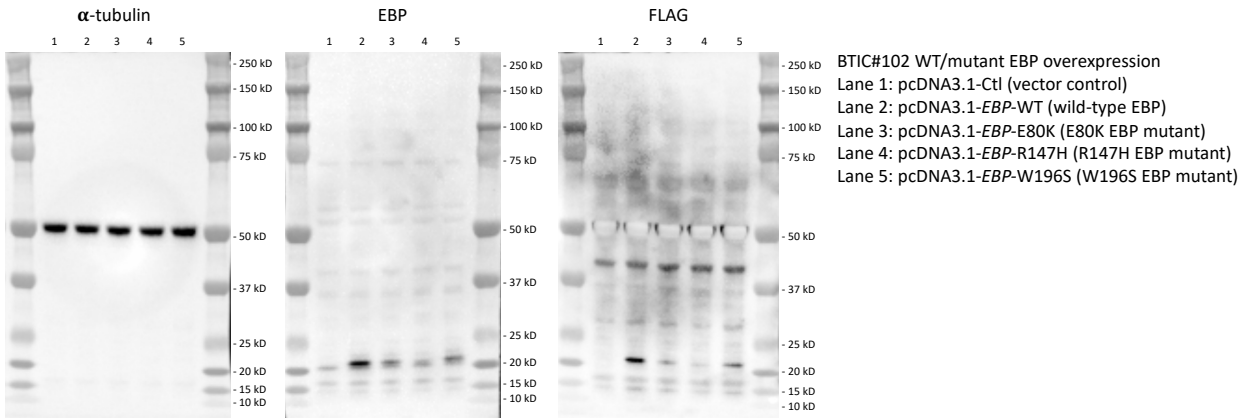

Supplement: s1 [file s1]
