# Supplementary material for: Repurposing Clemastine to Target Glioblastoma Cell Stemness
Source: MDPI journal article supplement (doi:10.3390/cancers15184619), 2023-09-18
Supplement: s1 [file s1]

**Table S2. List of plasmids, chemical compounds, reagents, kits, and equipment.**

| Category           | Name                                                         | Vendor         | Cat. Number |
|--------------------|--------------------------------------------------------------|----------------|-------------|
| Plasmids           | pcDNA3.1 V5-His A                                            | GenScript      | N/A         |
|                    | pcDNA3.1 <sup>+</sup> C-(K)-DYK-hEBP                         | GenScript      | OHu18817    |
|                    | pcDNA3.1 <sup>+</sup> C-(K)-DYK-hEBP-E80K                    | This lab       | N/A         |
|                    | pcDNA3.1 <sup>+</sup> C-(K)-DYK-hEBP-R147H                   | This lab       | N/A         |
|                    | pcDNA3.1 <sup>+</sup> C-(K)-DYK-hEBP-W196S                   | This lab       | N/A         |
|                    | EGFP-hGal3                                                   | Addgene        | 73080       |
|                    | PM-GFP                                                       | Addgene        | 21213       |
|                    | LentiCRISPRv2E                                               | Addgene        | 78852       |
| Chemical compounds | Clemastine (fumarate)                                        | Cayman         | 14637       |
|                    | Lathosterol                                                  | Cayman         | 9003102     |
|                    | Cholesterol-water soluble                                    | Sigma-Aldrich  | C4951       |
|                    | Tamoxifen                                                    | Sigma-Aldrich  | T5648       |
|                    | Puromycin dihydrochloride                                    | Sigma-Aldrich  | P8833       |
|                    | Dimethyl sulfoxide                                           | Sigma-Aldrich  | D2650-100ML |
|                    | Ascorbic acid                                                | Lonza          | CC-4398     |
|                    | Geneticin (G418 Sulfate)                                     | ThermoFisher   | 10131035    |
|                    | CW3388                                                       | Sigma-Aldrich  | SML2602     |
|                    | Polybrene                                                    | Sigma-Aldrich  | TR-1003     |
|                    | TASIN-1                                                      | Cayman         | 21155       |
|                    | Cetirizine                                                   | Cayman         | 19686       |
|                    | Fexofenadine                                                 | Cayman         | 18191       |
|                    | D-luciferin, sodium salt                                     | Goldbio        | LUCNA-1     |
|                    | 2-Mercaptoethanol                                            | Sigma-Aldrich  | M7522-100ML |
|                    | Tween 20                                                     | BIO-RAD        | 1706531     |
|                    | Methanol                                                     | VWR            | BDH1135-4LP |
|                    | Ethanol absolute                                             | VWR            | 89125-172   |
|                    | Isoflurane                                                   | Patterson      | 07-893-8441 |
|                    | DAPI                                                         | MilliporeSigma | D9542-10MG  |
|                    | Fluphenazine (hydrochloride)                                 | Cayman         | 23555       |
|                    | Perphenazine                                                 | Cayman         | 20735       |
|                    | Trifluoperazine (hydrochloride)                              | Cayman         | 15068       |
|                    | Raloxifene (hydrochloride)                                   | Cayman         | 10011620    |
|                    | Benztropine (mesylate)                                       | Cayman         | 16214       |
|                    | Perospirone (hydrochloride)                                  | Selleck        | S4889       |
|                    | Saponin                                                      | MilliporeSigma | 84510-100G  |
| Reagents and kits  | Human PDGF-AA                                                | Shenandoah     | 100-16      |
|                    | Human PDGF-BB                                                | Shenandoah     | 100-18      |
|                    | Laminin                                                      | MilliporeSigma | L2020       |
|                    | Triton X-100 solution                                        | Fluka          | 93443       |
|                    | Formalin 10%, neutral buffered                               | VWR            | 89370-094   |
|                    | Pierce™ 16% Formaldehyde (w/v), Methanol-free                | ThermoFisher   | 28908       |
|                    | Ponceau S solution                                           | Sigma-Aldrich  | P7170       |
|                    | Nitrocellulose Membrane, 0.45um; Roll 30 cm x 3.5 m          | Bio-Rad        | 1620115     |
|                    | Trans-Blot Turbo RTA Mini 0.2 µm Nitrocellulose Transfer Kit | Bio-Rad        | 1704270     |
|                    | NuPAGE 4-12% Bis-Tris Protein Gels, 1.0mm, 12 well           | ThermoFisher   | NP0322BOX   |

|                   |                                                                                |                   |                     |
|-------------------|--------------------------------------------------------------------------------|-------------------|---------------------|
| Reagents and kits | NuPAGE 4-12% Bis-Tris Protein Gels, 1.0mm, 10 well                             | ThermoFisher      | NP0321BOX           |
|                   | NuPAGE 4-12% Bis-Tris Protein Gels, 1.5mm, 15 well                             | ThermoFisher      | NP0336BOX           |
|                   | NuPAGE 4-12% Bis-Tris Protein Gels, 1.5mm, 10 well                             | ThermoFisher      | NP0335BOX           |
|                   | Mini Gel Tank                                                                  | ThermoFisher      | A25977              |
|                   | RNA to cDNA EcoDry™ Premix (Double Primed)                                     | Takara (Clontech) | 639548              |
|                   | KAPA SYBR FAST qPCR Master Mix (2X)                                            | Roche             | KK4602              |
|                   | SuperSignal™ West Pico PLUS Chemiluminescent Substrate                         | ThermoFisher      | 34580               |
|                   | Pierce™ BCA Protein Assay Kit                                                  | ThermoFisher      | 23225               |
|                   | Accutase solution                                                              | MilliporeSigma    | A6964-500ML         |
|                   | Corning 96-well Clear Flat Bottom Polystyrene TC-treated Microplate            | Corning           | 3595                |
|                   | Quick-RNA miniprep kit                                                         | Genesee           | 11-328 (Zymo R1055) |
|                   | UltraPure DNase/RNase-Free Distilled Water                                     | ThermoFisher      | 10977015            |
|                   | Dulbecco's Phosphate Buffered Saline                                           | MilliporeSigma    | D8537-500ML         |
|                   | PBS, pH 7.4                                                                    | ThermoFisher      | 10010023            |
|                   | DPBS, no calcium, no magnesium                                                 | ThermoFisher      | 14190144            |
|                   | 4X Laemmli Sample Buffer                                                       | BIO-RAD           | 1610747             |
|                   | Trypan Blue Solution (0.4%)                                                    | Sigma-Aldrich     | T8154               |
|                   | Opti-MEM™ I Reduced Serum Medium                                               | ThermoFisher      | 31985070            |
|                   | McCoy's 5A (Modified) Medium                                                   | ThermoFisher      | 16600082            |
|                   | Trypsin (2.5%), no phenol red                                                  | ThermoFisher      | 15090046            |
|                   | Lipofectamine 3000 Transfection Reagent                                        | ThermoFisher      | L3000008            |
|                   | Bovine Serum Albumin                                                           | Sigma-Aldrich     | A9647-100G          |
|                   | Restore Western Blot Stripping Buffer                                          | ThermoFisher      | 21059               |
|                   | NuPAGE MOPS SDS Running Buffer (20X)                                           | ThermoFisher      | NP0001              |
|                   | NuPAGE Antioxidant                                                             | ThermoFisher      | NP0005              |
|                   | Corning 1L 10X Tris Buffered Saline                                            | Corning           | 46-012-CM           |
|                   | 10x Tris Buffered Saline (TBS)                                                 | BIO-RAD           | 1706435             |
|                   | ProLong Gold Antifade Mountant                                                 | ThermoFisher      | P36934              |
|                   | SlowFade Diamond Antifade Mountant                                             | ThermoFisher      | S36972              |
|                   | FxCycle™ PI/RNase Staining Solution                                            | ThermoFisher      | F10797              |
|                   | S.O.C. Medium                                                                  | ThermoFisher      | 15544034            |
|                   | TempPlate full-skirted 96-well PCR plate                                       | USA Scientific    | 1402-9800           |
|                   | Precision Plus Protein Dual Color Standards                                    | BIO-RAD           | 1610374             |
|                   | 50x TAE (Tris/Acetic Acid/EDTA) Buffer, 1 L                                    | BIO-RAD           | 1610743             |
|                   | Non-fat dry milk                                                               | Genesee           | 20-241              |
|                   | Goat serum                                                                     | MilliporeSigma    | G9023-10ML          |
|                   | QuikChange Lightning Multi Site-Directed Mutagenesis Kit                       | Agilent           | 210519              |
|                   | ZymoPURE Plasmid Miniprep Kit                                                  | Genesee           | 11-553              |
|                   | Neon Transfection System 10 µL Kit                                             | ThermoFisher      | MPK1025             |
| Equipment         | Bioruptor Standard                                                             | Diagenode         | UCD-200             |
|                   | CFX96 Real-Time PCR Detection System                                           | BIO-RAD           | N/A                 |
|                   | Nunc Lab-Tek II Chamber Slide System - 2-well Chamber Slide w/ removable wells | ThermoFisher      | 154461              |
|                   | 3-well removeable chamber slides                                               | Ibidi             | 80381               |
|                   | PowerPac Basic Power Supply                                                    | BIO-RAD           | 1645050             |
|                   | Trans-Blot Turbo Transfer System                                               | BIO-RAD           | 1704150             |
|                   | ChemiDoc MP System                                                             | BIO-RAD           | 1708280             |
