# Supplementary material for: Repurposing Clemastine to Target Glioblastoma Cell Stemness
Source: MDPI journal article supplement (doi:10.3390/cancers15184619), 2023-09-18
Supplement: s1 [file s1]

**Table S1. List of primers, shRNA sequences, plasmids, chemicals, reagents, and antibodies.**

| Purposes                                                                                                                                                                                          | Gene name                       | Forward (F) or Reverse (R) | Sequence (5' to 3')                                             |
|---------------------------------------------------------------------------------------------------------------------------------------------------------------------------------------------------|---------------------------------|----------------------------|-----------------------------------------------------------------|
| RT-qPCR                                                                                                                                                                                           | ACTB                            | F                          | GATTCTCTATGTGGGCGACGA                                           |
|                                                                                                                                                                                                   |                                 | R                          | AGGTCTCAAACATGATCTGGGT                                          |
|                                                                                                                                                                                                   | B2M                             | F                          | TGCCGTGTGAACCATGTG                                              |
|                                                                                                                                                                                                   |                                 | R                          | ACCTCCATGATGCTGCTTACA                                           |
|                                                                                                                                                                                                   | NES                             | F                          | CTGGAGCAGGAGAAACAGGG                                            |
|                                                                                                                                                                                                   |                                 | R                          | GAGGGAAGTC TTGGAGCCAC                                           |
|                                                                                                                                                                                                   | SOX2                            | F                          | AACGGCAGCTACAGCATGAT                                            |
|                                                                                                                                                                                                   |                                 | R                          | GACTTGACCACCGAACCCAT                                            |
|                                                                                                                                                                                                   | PDGFRA                          | F                          | GACGGTCTTGAAGTGAGCA                                             |
|                                                                                                                                                                                                   |                                 | R                          | TAAAGCCCTGTCTGCTGTCTG                                           |
|                                                                                                                                                                                                   | CSPG4                           | F                          | GGGCCGTTCTCTATAGCCAC                                            |
|                                                                                                                                                                                                   |                                 | R                          | GACACCATCACCAGGTAGCC                                            |
|                                                                                                                                                                                                   | OLIG2                           | F                          | AGTGGCTTCAAGTCATCCTCG                                           |
|                                                                                                                                                                                                   |                                 | R                          | TGTTGATCTTGAGACGCAGCT                                           |
|                                                                                                                                                                                                   | DLL3                            | F                          | TAGCGCTCATTTTCTCCTCCC                                           |
|                                                                                                                                                                                                   |                                 | R                          | TGGATCTGCAGCTCGAAGAC                                            |
|                                                                                                                                                                                                   | PTPRZ1                          | F                          | GCAGTTGGATGGAGAGGACC                                            |
|                                                                                                                                                                                                   |                                 | R                          | TCGACAATCAGTTGGTCGCT                                            |
|                                                                                                                                                                                                   | CSPG5                           | F                          | GAGCTTCTAGTGCCCACTGG                                            |
|                                                                                                                                                                                                   |                                 | R                          | CATCCCCCTTGTCAGATGT                                             |
|                                                                                                                                                                                                   | NOTCH1                          | F                          | CAGATCCTGATCCGGAACCG                                            |
|                                                                                                                                                                                                   |                                 | R                          | CCAGAAACAGGGGTGTCTCC                                            |
|                                                                                                                                                                                                   | NCAN                            | F                          | GTGTCACTGCCTTCTTACCC                                            |
|                                                                                                                                                                                                   |                                 | R                          | TGCAATGATGGCTGAGCTGA                                            |
|                                                                                                                                                                                                   | MOG                             | F                          | AGGGAAAGGTGACTCTCAGGA                                           |
|                                                                                                                                                                                                   |                                 | R                          | GGAAGATGAGGCCAACAGTGA                                           |
|                                                                                                                                                                                                   | ERBB3                           | F                          | TGAATGGCCTGAGTGTGACC                                            |
|                                                                                                                                                                                                   |                                 | R                          | ATCGTAGACCTGGGTCCCTC                                            |
| EBP                                                                                                                                                                                               | F                               | TACTGGCTGGCCTCTTCTCT       |                                                                 |
|                                                                                                                                                                                                   | R                               | CCCAGGATGTATCGGCTGTC       |                                                                 |
| Actb                                                                                                                                                                                              | F                               | GGTGGGAATGGGTGAGAAGG       |                                                                 |
|                                                                                                                                                                                                   | R                               | GTACATGGCTGGGGTGTGTA       |                                                                 |
| B2m                                                                                                                                                                                               | F                               | TTTCAGTGGCTGCTACTCGG       |                                                                 |
|                                                                                                                                                                                                   | R                               | TGTTCCGGCTTCCCATTCTCC      |                                                                 |
| Ebp                                                                                                                                                                                               | F                               | ATCGAGGGCTGGTTCTCTCT       |                                                                 |
|                                                                                                                                                                                                   | R                               | GCCCATAGACACCACAAGCT       |                                                                 |
| Purposes                                                                                                                                                                                          | Name                            | Forward (F) or Reverse (R) | Sequence (5' to 3')                                             |
| sgRNA                                                                                                                                                                                             | sg-HRH1 -exon2-F1               | F                          | CACCGTACATCGTCAGCCTCTCGG                                        |
|                                                                                                                                                                                                   | sg-HRH1 -exon2-R1               | R                          | AAACCCGAGAGGCTGACGATGTAC                                        |
|                                                                                                                                                                                                   | sg-HRH1 -exon2-F2               | F                          | CACCGCAGACCTCGGTGCGCCGAG                                        |
|                                                                                                                                                                                                   | sg-HRH1 -exon2-R2               | R                          | AAACCTCGGCGCACCGAGGTCTGC                                        |
|                                                                                                                                                                                                   | sg-CHRM3 -exon5-F1              | F                          | CACCGGGTCATCGGTGGTACCGTC                                        |
|                                                                                                                                                                                                   | sg-CHRM3 -exon5-R1              | R                          | AAACGACGGTACCACCGATGACCC                                        |
|                                                                                                                                                                                                   | sg-CHRM3 -exon5-F2              | F                          | CACCGAAATGAGTGACGGTTCCCG                                        |
|                                                                                                                                                                                                   | sg-CHRM3 -exon5-R2              | R                          | AAACCGGGAACCGTCACTCATTTT                                        |
|                                                                                                                                                                                                   | sgRNA-control-F                 | F                          | CACCGTAGGCGCGCCGCTCTCTAC                                        |
|                                                                                                                                                                                                   | sgRNA-control-R                 | R                          | AAACGTAGAGAGCGGCGCGCCTAC                                        |
| PCR                                                                                                                                                                                               | PCR-HRH1 -F1                    | F                          | GGTCACAGTAGGGCTCAACC                                            |
|                                                                                                                                                                                                   | PCR-HRH1-R1                     | R                          | CACCACCAGCATCTTTTGGC                                            |
|                                                                                                                                                                                                   | PCR-M13F-CHRM3 -F1              | F                          | TGTAAACGACGGCCAGTCCCCAGACTATGTCAGAGAG                           |
|                                                                                                                                                                                                   | PCR-M13F-CHRM3 -R1              | R                          | CAGGAAACAGCTATGACCCCTAAGGCCCATCGATTTCATGA                       |
|                                                                                                                                                                                                   | pLentiCRISPR-R1                 | N/A                        | CCCGTTGCGAAAAAGAACGT                                            |
| EBP mutagenesis                                                                                                                                                                                   | E80K                            | F                          | CATTACCTGGTGATCAAGGGCTGGTTCGTTCT                                |
|                                                                                                                                                                                                   |                                 | R                          | AGAACGAACCAAGCCCTTGATCACCAGGTGAATG                              |
|                                                                                                                                                                                                   | R147H                           | F                          | GCCAGCATCCCCCTCCACTTTCATTCTACAGCT                               |
|                                                                                                                                                                                                   |                                 | R                          | AGCTGTAGAATGAAGTGAGGGGATGCTGGC                                  |
|                                                                                                                                                                                                   | W196S                           | F                          | GTCTTCATGAATGCCCTGTGCTGGTGCTG                                   |
| R                                                                                                                                                                                                 | CAGCACCAGCGACAGGGCATTTCATGAAGAC |                            |                                                                 |
| QuikChange Primer Design Program: <a href="https://www.agilent.com/store/primerDesignProgram.jsp?_requestid=1072141">https://www.agilent.com/store/primerDesignProgram.jsp?_requestid=1072141</a> |                                 |                            |                                                                 |
| Purposes                                                                                                                                                                                          | Gene name                       | Clone ID                   | Sequence (5' to 3')                                             |
| shRNA                                                                                                                                                                                             | EBP #1 (human)                  | TRCN0000049393             | CCGG-GCACCTAAGACTGGACAACCTT-CTCGAG-AAGTTGTCCAGTCTTAGGTGC-TTTTTG |
|                                                                                                                                                                                                   | EBP #2 (human)                  | TRCN0000049394             | CCGG-CTCCGCTTCATTCTACAGCTT-CTCGAG-AAGCTGTAGAATGAAGCGGAG-TTTTTG  |
|                                                                                                                                                                                                   | Ebp #1 (mouse)                  | TRCN0000111870             | CCGG-CCAGAAGACTCAAATCTTCTT-CTCGAG-AAGAAGATTGAGTCTTCTGG-TTTTTG   |
|                                                                                                                                                                                                   | Ebp #2 (mouse)                  | TRCN0000111872             | CCGG-CCAAGGGAGATAGCCGATATA-CTCGAG-TATATCGGCTATCTCCCTTGG-TTTTTG  |
|                                                                                                                                                                                                   | Non-targeting control           | SHC002                     | CCGG-CAACAAGATGAAGAGCACCAA-CTCGAG-TTGGTGTCTTTCATCTTGTG-TTTTTG   |
